# Supplementary material for: Energy exchanges at contact events guide sensorimotor integration
Source: eLife journal article supplement (doi:10.7554/elife.32587), 2018-05-29
Supplement: supp [file elife-32587-supp-v1.zip]

Archive with 1 entries (1 files):
- elife_poa_e32587_Transparent_Reporting_File.pdf
